# Supplementary material for: Nanoporous carbons through direct carbonization of a zeolitic imidazolate framework for supercapacitor electrodes
Source: Royal Society of Chemistry journal article supplement (doi:10.1039/c2cc33433j), 2012-01-01
Supplement: c2cc33433j.pdf [file c2cc33433j.pdf]

## Electronic Supplementary Information

### **Nanoporous Carbon through Direct Carbonization of Zeolitic Imidazolate Framework for Supercapacitor Electrodes**

**Watcharop Chaikittisilp,<sup>a</sup> Ming Hu,<sup>a</sup> Hongjing Wang,<sup>a,b</sup> Hou-Sheng Huang,<sup>c</sup> Taketoshi Fujita,<sup>a</sup> Kevin C.-W. Wu,<sup>d</sup> Lin-Chi Chen,<sup>c</sup> Yusuke Yamauchi<sup>\*a,b,e</sup> and Katsuhiko Ariga<sup>\*a,e</sup>**

<sup>a</sup> *World Premier International (WPI) Research Center for Materials Nanoarchitectonics (MANA), National Institute for Materials Science (NIMS), 1-1 Namiki, Tsukuba, Ibaraki 305-0044, Japan. E-mails: [Yamauchi.Yusuke@nims.go.jp](mailto:Yamauchi.Yusuke@nims.go.jp); [Ariga.Katsuhiko@nims.go.jp](mailto:Ariga.Katsuhiko@nims.go.jp)*

<sup>b</sup> *Faculty of Science and Engineering, Waseda University, 3-4-1 Okubo, Shinjuku, Tokyo 169-8555, Japan*

<sup>c</sup> *Department of Bio-Industrial Mechatronics Engineering, National Taiwan University, No. 1, Sec. 4, Roosevelt Rd., Taipei 10617, Taiwan*

<sup>d</sup> *Department of Chemical Engineering, National Taiwan University, No.1, Sec. 4, Roosevelt Road, Taipei 10617, Taiwan*

<sup>e</sup> *Precursory Research for Embryonic Science and Technology (PRESTO) & Core Research for Evolutional Science and Technology (CREST), Japan Science and Technology Agency (JST), 1-1 Namiki, Tsukuba 305-0044, Japan.*

## Experimental Section

**Synthesis of nanoporous carbon:** Nanoporous carbons were synthesized by carbonization of commercially available zeolitic imidazolate framework ZIF-8 (Basolite Z1200, purchased from Aldrich) under a flow of nitrogen gas at different temperature ranging from 600 to 1000 °C. Typically, about 500 mg of well ground ZIF-8 was homogeneously dispersed in a ceramic boat. The ceramic boat was then put into a tube furnace. The sample was exposed to a flow of nitrogen ( $\sim 45 \text{ mL}\cdot\text{min}^{-1}$ ) at room temperature for an hour and afterward the furnace was heated to the targeted carbonization temperature with a heating rate of  $5 \text{ }^\circ\text{C}\cdot\text{min}^{-1}$ . After reaching the targeted temperature, it was held for 5 h and then cooled down to room temperature. The resultant black powder was collected and then washed with a 10 wt% HF aqueous solution. The sample was stirred in the HF solution for 24 h and then collected by centrifugation. The washing process was repeated twice. Finally, the carbon sample was rinsed with a copious amount of distilled water and then dried at 60 °C overnight. The obtained nanoporous carbons are denoted as Z-*n*, where *n* is the carbonization temperature.

**Characterization:** Scanning electron microscopy (SEM) images were obtained with a Hitachi S-4800 instrument. Raman spectra were recorded on a Photon Design spectrometer using an argon ion laser with an excitation wavelength of 514 nm. Pore characteristics of the materials were assessed from nitrogen adsorption–desorption isotherms measured at -196 °C on a Micromeritics TriStar II 3020. Before the measurement, the samples were degassed at 180 °C under vacuum for 12 h. Thermogravimetric and differential thermal analysis (TG-DTA) was performed on an SII NanoTechnology TG/DTA 6200 instrument using pure nitrogen as a carrier gas with a heating rate of  $5 \text{ }^\circ\text{C}\cdot\text{min}^{-1}$ .

**Electrochemical test:** Cyclic voltammograms (CVs) were obtained from an ALS/CH Instruments electrochemical analyzer (model 611B) using a standard three-electrode cell at ambient temperature. The working electrodes were fabricated as follow. First, 2.0 mg of the

carbon sample was added to 1000  $\mu\text{L}$  of water and then subjected to ultrasonication for an hour. The suspension was dropped onto a glassy carbon electrode. After drying, a 0.5 wt% Nafion solution was coated on the sample. A platinum wire and an Ag/AgCl electrode were used as the counter and reference electrodes, respectively. For all electrochemical measurements, 0.5 M  $\text{H}_2\text{SO}_4$  was used as the electrolyte and the experiments were done within a potential range of -0.2 to 1.0 V (vs. Ag/AgCl) at different scan rates.

**Fig. S1**

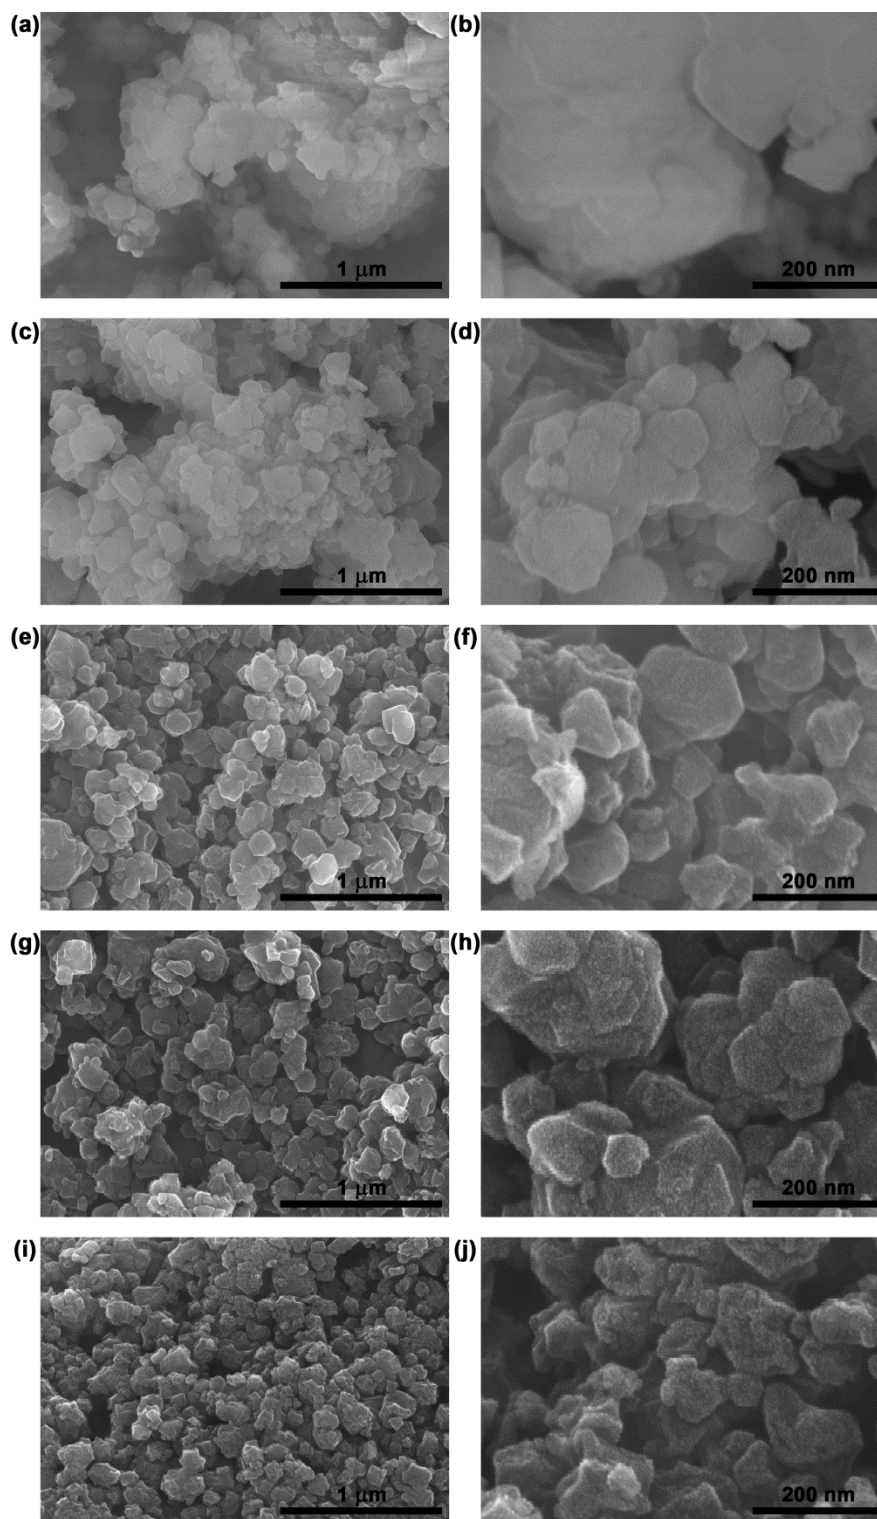

**Fig. S1** SEM images of (a, b) ZIF-8, (c, d) Z-700, (e, f) Z-800, (g, h) Z-900, and (i, j) Z-1000.

**Fig. S2**

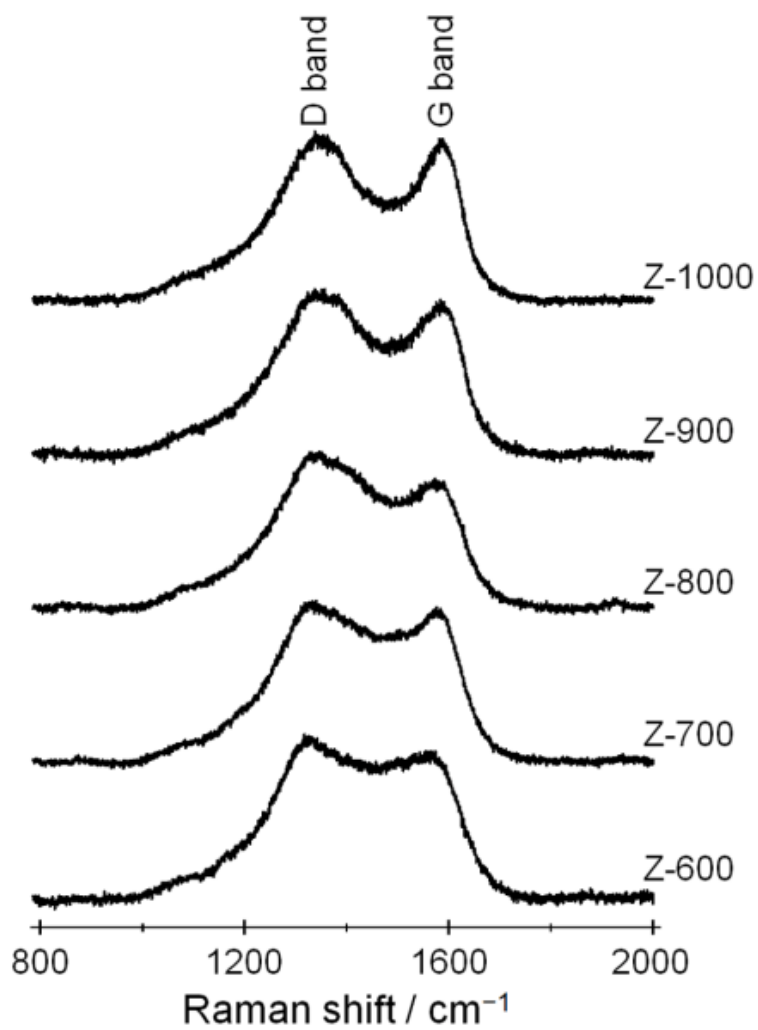

**Fig. S2** Raman spectra of the obtained nanoporous carbon samples.

Fig. S3

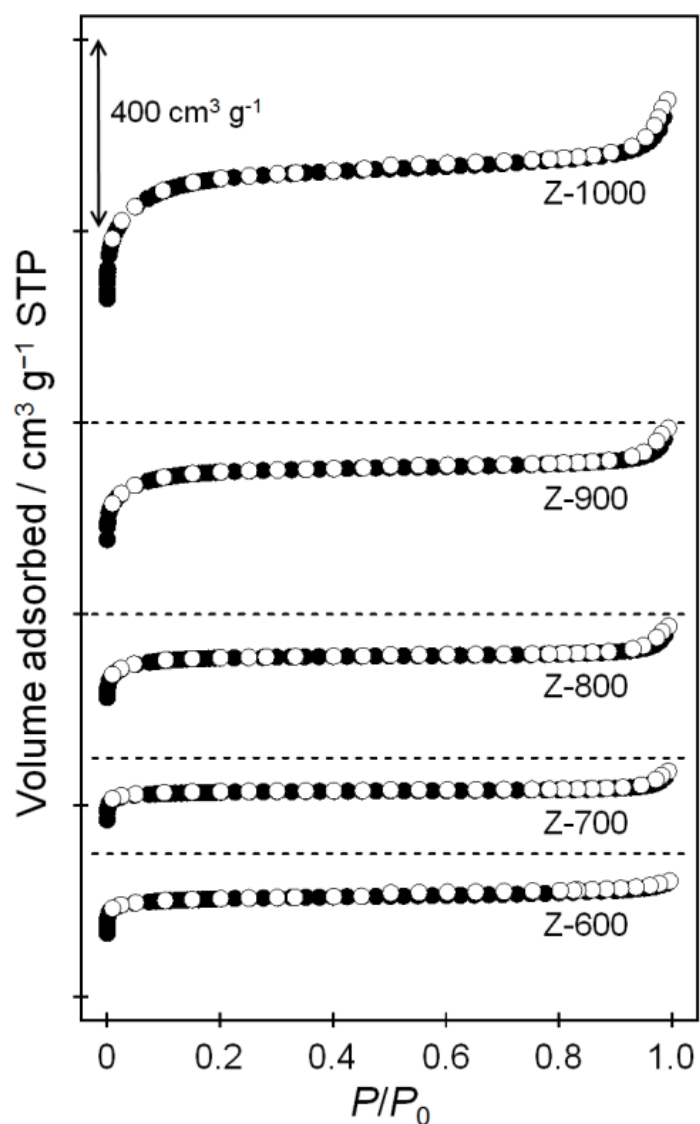

**Fig. S3** Nitrogen adsorption-desorption isotherms (solid and open symbols represent adsorption and desorption isotherms respectively) of the carbon samples *before acid washing*. The isotherms of Z-700, Z-800, Z-900, and Z-1000 are shifted vertically by 300, 500, 800, and 1200 cm<sup>3</sup> g<sup>-1</sup> STP, respectively.

**Fig. S4**

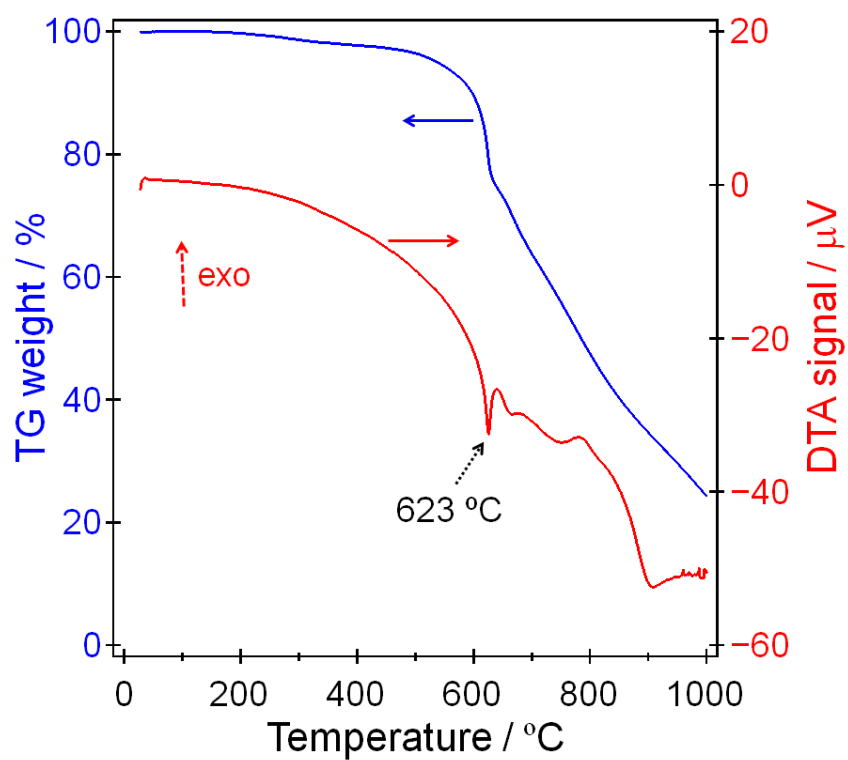

**Fig. S4** TG-DTA curves of ZIF-8 under nitrogen with a heating rate of 5 °C·min<sup>-1</sup>.

**Table S1** Capacitances in aqueous electrolytes of various porous carbons reported in the representative literatures.

| Material                                      | Electrolyte                          | Potential range/ | Scan rate/         | Particle density <sup>a/</sup> | Capacitance <sup>b</sup> |                     |                    | Ref.      |
|-----------------------------------------------|--------------------------------------|------------------|--------------------|--------------------------------|--------------------------|---------------------|--------------------|-----------|
|                                               |                                      | V                | mV·s <sup>-1</sup> | g·cm <sup>-3</sup>             | F·g <sup>-1</sup>        | μF·cm <sup>-2</sup> | F·cm <sup>-3</sup> |           |
| <i>MOF-derived carbon</i>                     |                                      |                  |                    |                                |                          |                     |                    |           |
| Z-900                                         | 0.5 M H <sub>2</sub> SO <sub>4</sub> | -0.2 to 1.0      | 5                  | 0.93                           | 214                      | 20                  | 200                | This work |
| NPC                                           | 1 M H <sub>2</sub> SO <sub>4</sub>   | -0.5 to 0.5      | 5                  | 0.39                           | 204                      | 7                   | 80                 | S1        |
| NPC <sub>650</sub>                            | 1 M H <sub>2</sub> SO <sub>4</sub>   | -0.5 to 0.5      | 5                  | 0.51                           | 167                      | 11                  | 84                 | S2        |
| C800                                          | 1 M H <sub>2</sub> SO <sub>4</sub>   | -0.5 to 0.5      | 5                  | 0.50                           | 188                      | 9                   | 94                 | S3        |
| C1000                                         | 1 M H <sub>2</sub> SO <sub>4</sub>   | -0.5 to 0.5      | 5                  | 0.32                           | 161                      | 5                   | 52                 | S3        |
| MC-A                                          | 6 M KOH                              | -1.0 to 0        | 2                  | 0.55                           | 208                      | 12                  | 114                | S4        |
| MPC-A                                         | 6 M KOH                              | -1.0 to 0        | 2                  | 0.41                           | 196                      | 15                  | 81                 | S4        |
| MAC-A                                         | 6 M KOH                              | -1.0 to 0        | 2                  | 0.61                           | 271                      | 12                  | 165                | S4        |
| <i>Templated porous carbon by nanocasting</i> |                                      |                  |                    |                                |                          |                     |                    |           |
| Y-AN                                          | 1 M H <sub>2</sub> SO <sub>4</sub>   | 0 to 0.6         | 2                  | 0.74                           | 340                      | 20                  | 250                | S5        |
| BMC-I                                         | 1 M H <sub>2</sub> SO <sub>4</sub>   | 0 to 0.8         | 2                  | 0.96                           | 112                      | 17                  | 108                | S6        |
| BMC-II                                        | 1 M H <sub>2</sub> SO <sub>4</sub>   | 0 to 0.8         | 2                  | 1.01                           | 99                       | 21                  | 100                | S6        |
| <i>Carbon aerogel-derived carbon</i>          |                                      |                  |                    |                                |                          |                     |                    |           |
| CA1-800                                       | 2 M H <sub>2</sub> SO <sub>4</sub>   | 0 to 1.2         | 2                  | 0.50                           | 225                      | 31                  | 111                | S7        |
| COU-2                                         | 1 M H <sub>2</sub> SO <sub>4</sub>   | -0.2 to 0.8      | 2                  | 0.86                           | 184                      | 27                  | 159                | S8        |
| K-COU-2                                       | 1 M H <sub>2</sub> SO <sub>4</sub>   | -0.2 to 0.8      | 2                  | 0.57                           | 244                      | 14                  | 139                | S8        |
| AMC-6                                         | 0.1 M NaCl                           | -0.4 to 0.6      | 1                  | 0.48                           | 188                      | 10                  | 91                 | S9        |
| <i>Carbide-derived carbon</i>                 |                                      |                  |                    |                                |                          |                     |                    |           |
| TiC-CDC                                       | 1 M H <sub>2</sub> SO <sub>4</sub>   | -0.5 to 0.5      | 5                  |                                | 190                      | 12 <sup>c</sup>     | 140 <sup>c</sup>   | S10       |
| <i>Carbon fiber-based material</i>            |                                      |                  |                    |                                |                          |                     |                    |           |
| ACF4                                          | 6 M KOH                              | 0 to 1.0         | 1                  | 0.38                           | 371                      | 11                  | 139                | S11       |

<sup>a</sup> Particle density = [Total pore volume + 1/ρ<sub>carbon</sub>]<sup>-1</sup>, where ρ<sub>carbon</sub> is the true density of carbon (2 g·cm<sup>-3</sup>)<sup>S12</sup>.

<sup>b</sup> Gravimetric capacitances in F·g<sup>-1</sup> were taken from the references; interfacial capacitances in μF·cm<sup>-2</sup> were normalized to the BET surface area; volumetric capacitances in F·cm<sup>-3</sup> were calculated from the particle density of carbon materials.

<sup>c</sup> Taken from the reference.



## References

- S1 B. Liu, H. Shioyama, T. Akita and Q. Xu, *J. Am. Chem. Soc.*, 2008, **130**, 5390.  
S2 B. Liu, H. Shioyama, H. Jiang, X. Zhang and Q. Xu, *Carbon*, 2010, **48**, 456.  
S3 H.-L. Jiang, B. Liu, Y.-Q. Lan, K. Kuratani, T. Akita, H. Shioyama, F. Zong and Q. Xu, *J. Am. Chem. Soc.*, 2011, **133**, 11854.  
S4 J. Hu, H. Wang, Q. Gao and H. Guo, *Carbon*, 2010, **48**, 3599.  
S5 C. O. Ania, V. Khomenko, E. Raymundo-Piñero, J. B. Parra and F. Béguin, *Adv. Funct. Mater.*, 2007, **17**, 1828.  
S6 D.-W. Wang, F. Li, Z.-G. Chen, G. Q. Lu and H.-M. Cheng, *Chem. Mater.*, 2008, **20**, 7195.  
S7 M. C. Gutiérrez, F. Picó, F. Rubio, J. M. Amarilla, F. J. Palomares, M. L. Ferrer, F. del Monte and J. M. Rojo, *J. Mater. Chem.*, 2009, **19**, 1236.  
S8 J. Jin, S. Tanaka, Y. Egashira and N. Nishiyama, *Carbon*, 2010, **48**, 1985.  
S9 X. Wang, J. S. Lee, C. Tsouris, D. W. DePaolib and S. Dai, *J. Mater. Chem.*, 2010, **20**, 4602.  
S10 J. Chmiola, G. Yushin, R. Dash and Y. Gogotsi, *J. Power Sources*, 2006, **158**, 765.  
S11 B. Xu, F. Wu, R. Chen, G. Cao, S. Chen, Z. Zhou and Y. Yang, *Electrochem. Commu.*, 2008, **10**, 795.  
S12 H. Itoi, H. Nishihara, T. Kogure and T. Kyotani, *J. Am. Chem. Soc.*, 2011, **133**, 1165.
